# Supplementary material for: Accuracy of Magnetic Resonance Imaging–Guided Biopsy to Verify Breast Cancer Pathologic Complete Response After Neoadjuvant Chemotherapy: A Nonrandomized Controlled Trial
Source: PubMed Central journal article supplement (PMC7811182; doi:10.1001/jamanetworkopen.2020.34045), 2021-01-15
Supplement: jamanetwopen-e2034045-s003.pdf [file jamanetwopen-e2034045-s003.pdf]

## Data Sharing Statement

Sutton. Accuracy of Magnetic Resonance Imaging-Guided Biopsy to Verify Breast Cancer Pathologic Complete Response After Neoadjuvant Chemotherapy. *JAMA Netw Open*. Published January 15, 2021. doi:10.1001/jamanetworkopen.2020.34045

### Data

**Data available:** Yes

**Data types:** Other (please specify)

**Additional Information:** The protocol summary, a statistical summary, and informed consent form will be made available on clinicaltrials.gov when required as a condition of Federal awards, other agreements supporting the research and/or as otherwise required.

**How to access data:** Requests may be made to: [suttone@mskcc.org](mailto:suttone@mskcc.org)

**When available:** With publication

### Supporting Documents

**Document types:** None

### Additional Information

**Who can access the data:** Data will be shared with qualified researchers whose proposed use of the data has been approved

**Types of analyses:** For any reasonable purpose

**Mechanisms of data availability:** Requests for deidentified individual participant data reported in the manuscript will be shared under the terms of a Data Use Agreement and may only be used for approved proposals.
